# Supplementary material for: Assessing species vulnerability to climate change
Source: Springer Nature journal article supplement (doi:10.1038/nclimate2448), 2015-02-24
Supplement: 41558_2015_BFnclimate2448_MOESM263_ESM.pdf [file 41558_2015_BFnclimate2448_MOESM263_ESM.pdf]

# Assessing species vulnerability to climate change

Michela Pacifici\*, Wendy B. Foden, Piero Visconti, James E. M. Watson, Stuart H.M. Butchart, Kit M. Kovacs, Brett R. Scheffers, David G. Hole, Tara G. Martin, H. Resit Akçakaya, Richard T. Corlett, Brian Huntley, David Bickford, Jamie A. Carr, Ary A. Hoffmann, Guy F. Midgley, Paul Pearce-Kelly, Richard G. Pearson, Stephen E. Williams, Stephen G. Willis, Bruce Young, & Carlo Rondinini

\*To whom correspondence should be addressed. E-mail: [michela.pacifici@uniroma1.it](mailto:michela.pacifici@uniroma1.it)

## This file includes:

References 101-129 for Table 1 and Box 1

References listed in Table 1 and Box 1

101. Rodríguez-Sánchez, F. & Arroyo, J. Reconstructing the demise of Tethyan plants: climate-driven range dynamics of *Laurus* since the Pliocene. *Glob. Ecol. Biogeogr.* **17**, 685–695 (2008).
102. Lawler, J.J., White, D., Neilson, R.P. & Blaustein, A.R. Predicting climate-induced range shifts: model differences and model reliability. *Glob. Change Biol.* **12**, 1568–1584 (2006).
103. Hole, D.G. et al. Projected impacts of climate change on a continent-wide protected area network. *Ecol. Lett.* **12**, 420–31 (2009).
104. Guralnick, R. Differential effects of past climate warming on mountain and flatland species distributions: a multispecies North American mammal assessment. *Glob. Ecol. Biogeogr.* **16**, 14–23 (2007).
105. Midgley, G.F., Hannah, L., Millar, D., Rutherford, M.C. & Powrie, L.W. Assessing the vulnerability of species richness to anthropogenic climate change in a biodiversity hotspot. *Glob. Ecol. Biogeogr.* **11**, 445–451 (2002).
106. Waltari, E. et al. Locating pleistocene refugia: comparing phylogeographic and ecological niche model predictions. *PLoS One* **2**, e563 (2007).
107. Johnston, K.M.J., Reund, K.A.F. & Chmitz, O.J.S. Projected range shifting by montane mammals under climate change : implications for Cascadia’s National Parks. *Ecosphere* **3**, 1–51 (2012).
108. Schwartz, M.W., Iverson, L.R., Prasad, A.M., Matthews, S.N. & O’Connor R.J. Predicting extinctions as a result of climate change. *Ecology* **87**, 1611–1615 (2006).
109. Guisan, A. & Theurillat, J. Assessing alpine plant vulnerability to climate change: a modeling perspective. *Integr. Assess.* **1**, 307–320 (2001).

110. Svenning, J., Normand, S. & Skov, F. Postglacial dispersal limitation of widespread forest plant species in nemoral Europe. *Ecography* **31**, 316–326 (2008).
111. Molnár, P.K., Derocher, A. E., Thiemann, G.W. & Lewis, M.A. Predicting survival, reproduction and abundance of polar bears under climate change. *Biol. Conserv.* **143**, 1612–1622 (2010).
112. Saltz, D., Rubenstein, D.I. & White, G.C. The impact of increased environmental stochasticity due to climate change on the dynamics of asiatic wild ass. *Conserv. Biol.* **20**, 1402–9 (2006).
113. Sunday, J.M., Bates, A.E. & Dulvy, N.K. Thermal tolerance and the global redistribution of animals. *Nat. Clim. Change.* **2**, 686–690 (2012).
114. Aiello-Lammens, M.E. et al. The impact of sea-level rise on Snowy Plovers in Florida: integrating geomorphological, habitat, and metapopulation models. *Glob. Change Biol.* **17**, 3644–3654 (2011).
115. Beerling, D.J. Ecophysiological responses of woody plants to past CO(2) concentrations. *Tree Physiol.* **16**, 389–96 (1996).
116. Huntley, B. et al. Beyond bioclimatic envelopes: dynamic species' range and abundance modelling in the context of climatic change. *Ecography (Cop.)*. **33**, 621–626 (2010).
117. Kearney, M. et al. Modelling species distributions without using species distributions : the cane toad in Australia under current and future climates. *Ecography (Cop.)*. **31**, 423–434 (2008).
118. Blois, J.L. & Hadly, E.A. Mammalian Response to Cenozoic Climatic Change. *Annu. Rev. Earth Planet. Sci.* **37**, 181–208 (2009).
119. Chin, A., Kyne, P.M., Walker, T.I. & McAuley, R.B. An integrated risk assessment for climate change: analysing the vulnerability of sharks and rays on Australia's Great Barrier Reef. *Glob. Change Biol.* **16**, 1936–1953 (2010).
120. Davison, J. E. et al. Bringing indices of species vulnerability to climate change into geographic space: an assessment across the Coronado national forest. *Biodivers. Conserv.* **21**, 189–204 (2011).
121. Blois, J.L., McGuire, J.L. & Hadly, E.A. Small mammal diversity loss in response to late-Pleistocene climatic change. *Nature* **465**, 771–4 (2010).
122. Finch, D.M., Friggens, M. M., Bagne, K. E., Coe, S. J. & Hawksworth, D. L. Vulnerability of individual species to climate change: vertebrate species of the middle rio grande bosque, New Mexico. (2010).
123. New, M., Lister, D., Hulme, M. & Makin, I. A high-resolution data set of surface climate over global land areas. *Clim. Res.* **21**, 1–25 (2002).
124. Hijmans, R.J., Cameron, S.E., Parra, J.L., Jones, P.G. & Jarvis, A. Very high resolution interpolated climate surfaces for global land areas. *Int. J. Climatol.* **25**, 1965–1978 (2005).
125. Sekerciöglu, C.H., Daily, G.C. & Ehrlich, P.R. Ecosystem consequences of bird declines. *Proc. Natl. Acad. Sci.* **101**, 18042–7 (2004).
126. Jones, K.E. et al. PanTHERIA : a species-level database of life history, ecology, and geography of extant and recently extinct mammals. *Ecology* **90**, 2648 (2009).

127. Sodhi, N.S. et al. Measuring the meltdown: drivers of global amphibian extinction and decline. *PLoS One* **3**, e1636 (2008).
128. Martin, T.G., Burgman, M.A., Fidler, F., Kuhnert, P.M., Low-Choy, S., McBride, M., Mengersen, K., Eliciting expert knowledge in conservation science. *Conservation Biology* **26**, 29-38 (2012).
129. Flockhart, D.T.T., Pichancourt, J.-B., Norris, D.R., Martin, T.G. Unravelling the annual cycle in a migratory animal: breeding-season habitat loss drives population declines of monarch butterflies. *Journal of Animal Ecology*, DOI: 10.1111/1365-2656.12253 (2014).
